# Supplementary material
Source: publisher figshare collection journal article supplement (https://acs.figshare.com/ndownloader/files/20700378)
Supplement: Supplementary file 1 [file 20700378]

## **Supporting Information**

### **Ammonia Syngas Production from Coal Mine Drainage Gas with CO<sub>2</sub> Capture via Enrichment and Sorption-enhanced Auto-thermal Reforming**

Junjun Yin<sup>1</sup>, Shi Su, Jun-Seok Bae, Xin Xiang Yu, Michael Cunnington, Yonggang Jin

CSIRO Mineral Resources, PO Box 883, Kenmore, QLD 4069, Australia

---

<sup>1</sup> Corresponding author. Tel: +61 7 3327 4069; fax: +61 7 3327 4455  
Email: [jon.yin@csiro.au](mailto:jon.yin@csiro.au)

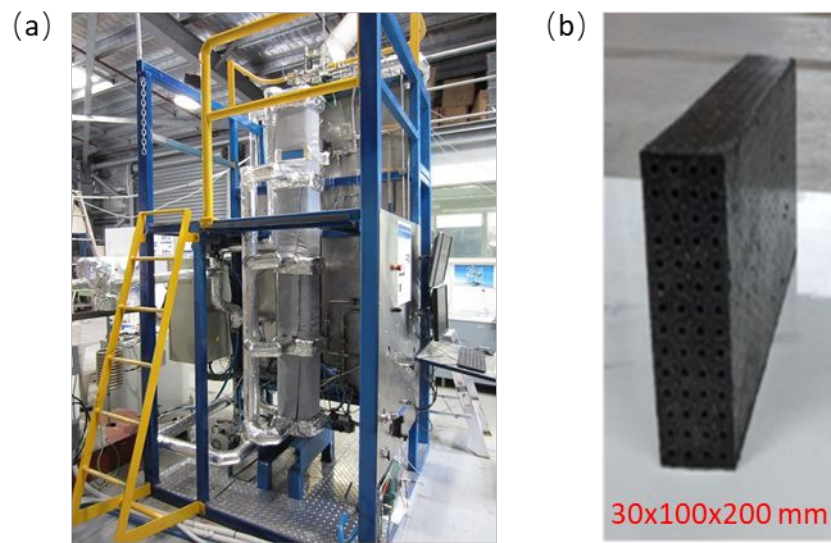

Figure S1 (a) Large-scale test unit and (b) Honeycomb monolith (HM) carbon fibre composites for methane enrichment tests

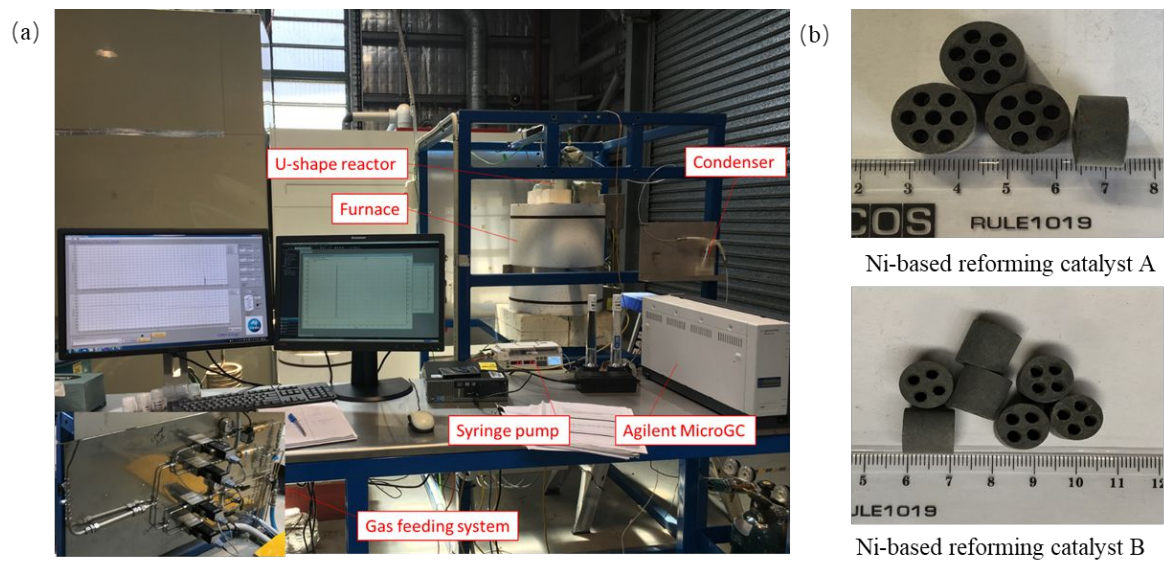

Figure S2 Photos of (a) the lab-scale fixed-bed test unit and (b) commercial Ni-based catalysts for the ATR and SE-ATR tests
